# Supplementary material for: Comparative Efficacy and Safety of Dupilumab and Benralizumab in Patients with Inadequately Controlled Asthma: A Systematic Review
Source: MDPI journal article supplement (doi:10.3390/ijms21030889), 2020-01-30
Supplement: s1 [file s1]

## Supplementary Information

### Supplementary Table S1

Characteristics and key inclusion criteria for the studies included in this analysis. The intension to treat (ITT) population were patients who were randomized regardless of whether an intervention was performed. In LIBERTY ASTHMA QUEST, the placebo had a volume of 2.00 ml which matched the higher dose of dupilumab, and 1.14 ml which matched the lower dose of dupilumab.

| Study name                      | Study duration (weeks) | Treatment arms                                                  | Number of patients (ITT) | Key inclusion criteria                                                                                                                                                                                                            |
|---------------------------------|------------------------|-----------------------------------------------------------------|--------------------------|-----------------------------------------------------------------------------------------------------------------------------------------------------------------------------------------------------------------------------------|
| LIBERTY<br>ASTHMA QUEST<br>[21] | 52                     | • dupilumab 300 mg (loading dose, 600 mg) s.c. e2w <sup>a</sup> | 633                      | <ul style="list-style-type: none"> <li>• ≥500 µg ICS</li> <li>• ≥1 asthma exacerbation in the previous 12 months</li> <li>• ≥12% or ≥FEV<sub>1.0</sub> reversibility</li> <li>• ≥1.5 ACQ-5 score<sup>b</sup></li> </ul>           |
|                                 |                        | • dupilumab 200 mg (loading dose, 400 mg) s.c. e2w              | 631                      |                                                                                                                                                                                                                                   |
|                                 |                        | • Placebo 2.0 ml <sup>a</sup>                                   | 321                      |                                                                                                                                                                                                                                   |
|                                 |                        | • Placebo 1.14 ml                                               | 317                      |                                                                                                                                                                                                                                   |
|                                 |                        | /total                                                          | 1902                     |                                                                                                                                                                                                                                   |
| CALIMA [24]                     | 56                     | • benralizumab 30 mg e8w (first three doses e4w) <sup>a</sup>   | 441                      | <ul style="list-style-type: none"> <li>• ≥500 µg ICS</li> <li>• ≥2 asthma exacerbation in the previous 12 months</li> <li>• ≥12% or ≥200 ml of FEV<sub>1.0</sub> reversibility</li> <li>• ≥1.5 ACQ-6 score<sup>b</sup></li> </ul> |
|                                 |                        | • benralizumab 30 mg every 4 weeks                              | 425                      |                                                                                                                                                                                                                                   |
|                                 |                        | • Placebo <sup>a</sup>                                          | 440                      |                                                                                                                                                                                                                                   |
|                                 |                        | /total                                                          | 1306                     |                                                                                                                                                                                                                                   |
| SIROCCO [23]                    | 48                     | • benralizumab 30 mg e8w (first three doses e4w) <sup>a</sup>   | 398                      | <ul style="list-style-type: none"> <li>• ≥500 µg ICS</li> <li>• ≥2 asthma exacerbation in the previous 12 months</li> <li>• ≥12% or ≥200 ml of FEV<sub>1.0</sub> reversibility</li> </ul>                                         |
|                                 |                        | • benralizumab 30 mg every 4 weeks                              | 399                      |                                                                                                                                                                                                                                   |
|                                 |                        | • Placebo <sup>a</sup>                                          | 407                      |                                                                                                                                                                                                                                   |

|                                                                                                                                                                                                                                  | /total | 1204 | •≥1.5 ACQ-6 score <sup>b</sup> |
|----------------------------------------------------------------------------------------------------------------------------------------------------------------------------------------------------------------------------------|--------|------|--------------------------------|
| <sup>a</sup> treatment groups included in this analysis                                                                                                                                                                          |        |      |                                |
| <sup>b</sup> the 5-item Asthma Control Questionnaire (ACQ-5) or the 6-item Asthma Control Questionnaire (ACQ-6) represents the patient’s-reported measure of symptoms of asthma control and change in symptoms due to treatment. |        |      |                                |

**Supplementary Table S2****Search strategies****Source: Pubmed****Searched on: April 20, 2019**

|     |                                                       |         |
|-----|-------------------------------------------------------|---------|
| #1  | Search asthma [MeSH Terms]                            | 122493  |
| #2  | Search asthma [Title/Abstract]                        | 140734  |
| #3  | #1 OR #2                                              | 166708  |
| #4  | "dupilumab " [Supplementary Concept]                  | 116     |
| #5  | Search (dupilumab)                                    | 332     |
| #6  | Search (SAR231893)                                    | 117     |
| #7  | Search (anti-IL-4)                                    | 789     |
| #8  | Search (anti-interleukin-4)                           | 65      |
| #9  | Search (dupixent)                                     | 22      |
| #10 | #4 OR #5 OR #6 OR #7 OR #8 OR #9                      | 1139    |
| #11 | "benralizumab " [Supplementary Concept]               | 57      |
| #12 | Search (benralizumab)                                 | 150     |
| #13 | Search (MEDI-563)                                     | 154     |
| #14 | Search (anti-IL-5)                                    | 515     |
| #15 | Search (anti-interleukin-5)                           | 130     |
| #16 | Search (Fasenra)                                      | 8       |
| #17 | #11 OR #12 OR #13 OR #14 OR #15 OR #16                | 717     |
| #18 | Search antibodies, monoclonal, humanized [MeSH Terms] | 47550   |
| #19 | #10 OR #17 OR #18                                     | 49151   |
| #20 | Randomized Controlled trial [ Title/Abstract]         | 61356   |
| #21 | Controlled clinical trial [Title/Abstract]            | 12979   |
| #22 | Randomized [Title/Abstract]                           | 476493  |
| #23 | Placebo [Title/Abstract]                              | 202573  |
| #24 | Randomly [Title/Abstract]                             | 310074  |
| #25 | Trial [Title/Abstract]                                | 545083  |
| #26 | Drug Therapy [Title/Abstract]                         | 46861   |
| #27 | Groups [Title/Abstract]                               | 1931613 |
| #28 | #20 OR #21 OR #22 OR #23 OR #24 OR #25 OR #26 OR #27  | 2735222 |
| #29 | #3 AND #19 AND #28 Filters: Humans                    | 348     |

**Results: 348**
